# Supplementary material for: Lipopolysaccharide-induced sepsis impairs M2R-GIRK signaling in the mouse sinoatrial node
Source: PubMed Central journal article supplement — Proc Natl Acad Sci U S A. 2023 Jul 5;120(28):e2210152120. doi: 10.1073/pnas.2210152120 (PMC10334783; doi:10.1073/pnas.2210152120), 2023-07-05
Supplement: pnas.2210152120.sapp.pdf [file pnas.2210152120.sapp.pdf]

1

2

## 3 **Supplementary Information for**

4 **Title:** Lipopolysaccharide-induced sepsis impairs M2R-GIRK signaling  
5 in the mouse sinoatrial node

6 Niroj Shrestha<sup>a,1</sup>, Klaus Zorn-Pauly<sup>a,1</sup>, Pietro Mesirca<sup>b,c</sup>, Chintan N. Koyani<sup>d</sup>, Gerald Wölkart<sup>e</sup>,  
7 Valentina Di Biase<sup>f</sup>, Eleonora Torre<sup>b,c</sup>, Petra Lang<sup>a</sup>, Astrid Gorischek<sup>a</sup>, Wolfgang Schreibmayer<sup>a</sup>,  
8 Robert Arnold<sup>a</sup>, Heinrich Maechler<sup>g</sup>, Bernd Mayer<sup>e</sup>, Dirk von Lewinski<sup>d</sup>, Angelo G. Torrente<sup>b,c</sup>,  
9 Matteo E. Mangoni<sup>b,c</sup>, Brigitte Pelzmann<sup>a,2</sup>, Susanne Scheruebel<sup>a,2</sup>

10 <sup>a</sup>Gottfried Schatz Research Center for Cell Signaling, Metabolism and Aging, Medical Physics and  
11 Biophysics, Medical University of Graz, 8010 Graz, Austria

12 <sup>b</sup>Institut de Génomique Fonctionnelle, Université de Montpellier, CNRS, Inserm, 34094 Montpellier,  
13 France

14 <sup>c</sup>Laboratory of Excellence in Ion Channels Science and Therapeutics, 34094 Montpellier, France

15 <sup>d</sup>Division of Cardiology, Medical University of Graz, 8036 Graz, Austria

16 <sup>e</sup>Department of Pharmacology and Toxicology, University of Graz, 8010 Graz, Austria

17 <sup>f</sup>Institute of Pharmacology, Medical University of Innsbruck, 6020 Innsbruck, Austria

18 <sup>g</sup>Division of Cardiac Surgery, Medical University of Graz, 8036 Graz, Austria

19 <sup>1</sup>These authors contributed equally to the work.

20 <sup>2</sup>Correspondance email: [brigitte.pelzmann@medunigraz.at](mailto:brigitte.pelzmann@medunigraz.at)

21 [susanne.scheruebel@medunigraz.at](mailto:susanne.scheruebel@medunigraz.at)

22

23 **This PDF file includes:**

24 **Figures S1 to S7**

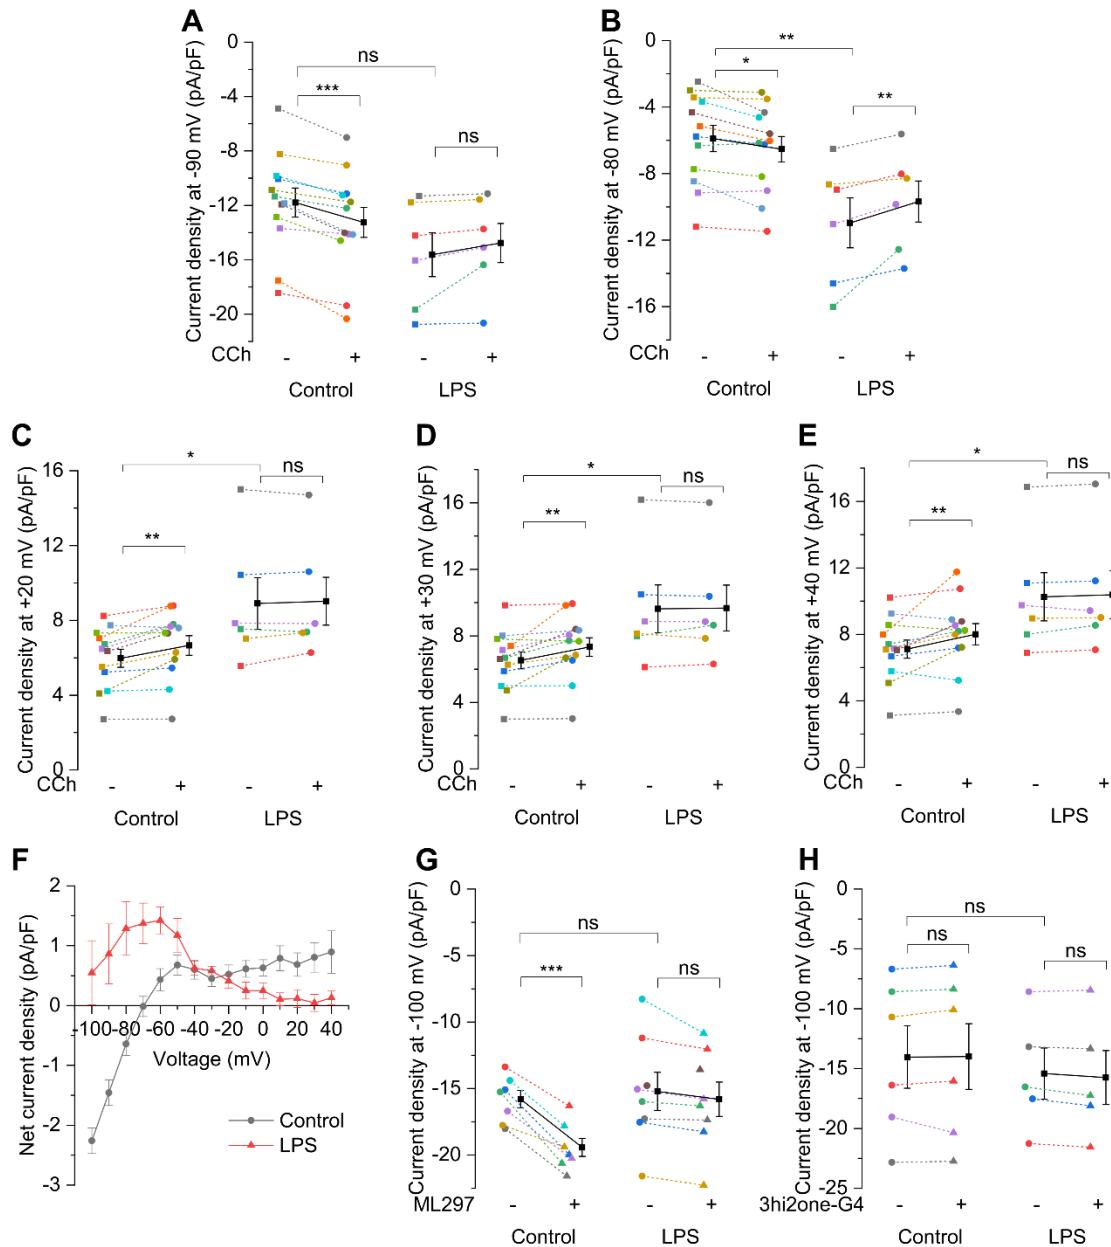

25

26 **Fig. S1. LPS inhibits CCh- and ML297-mediated increase in steady-state current density in**  
 27 **isolated SAN cells.** Scatter plots with mean ± SEM for current density at -90, -80, +20, +30 and  
 28 +40 mV for ramps in Fig. 3A, 3B in the absence (-) and presence (+) of 0.1 μM CCh (A-E) and at -  
 29 100 mV in the absence (-) and presence (+) of 3 μM ML297 (G) and 30 μM 3hi2one-G4 (H) in the  
 30 SAN cells isolated from LPS-injected mice. (F) Traces showing mean ± SEM of difference current  
 31 ( $I_{CCh} - I_{basal}$ , CCh-induced) density from -100 to +40 mV ramp over 1.5 s in the SAN cells from control  
 32 vs. LPS-injected mice. N = 6 (A-F), N = 8 (G)) vs controls (N = 12 (A-F), N = 7 (G)); \*p < 0.05, \*\*p <  
 33 0.01, \*\*\*p < 0.001, <sup>ns</sup>p > 0.05; mixed two-way ANOVA followed by simple effect analysis.

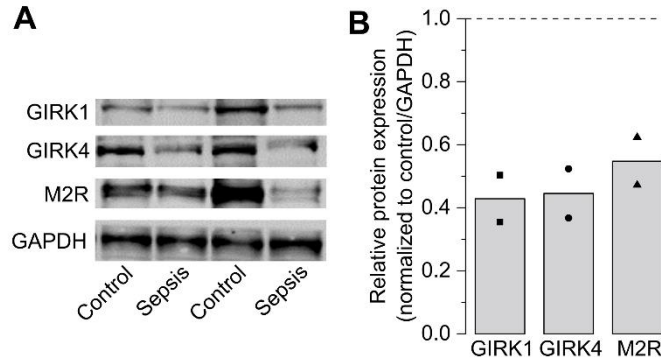

34

35 **Fig. S2. Reduced expression of M2R and GIRK1/4 channels in human right atrial appendages**  
 36 **(RAA) in sepsis.** (A) Western blots and (B) densitometric evaluation of immunoreactive bands  
 37 showing reduced expression of GIRK1, GIRK4 and M2R in RAA of septic patients compared to  
 38 control patients. GAPDH is used as a loading control. Bars represent mean and symbols represent  
 39 independent experiments (N = 2).

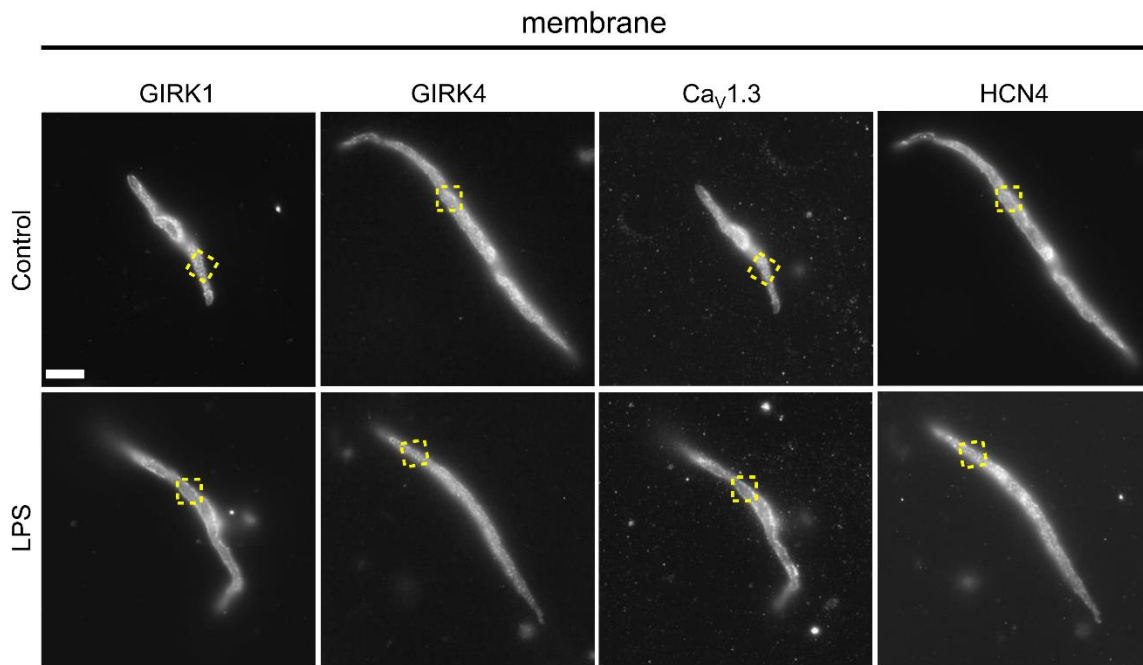

40

41 **Fig. S3. LPS reduces expression of ion-channels in SAN cells involved in parasympathetic**  
 42 **modulation.** Representative immunofluorescence images of SAN cells isolated from control  
 43 (above) and LPS-injected (below) mice showing membrane expression of GIRK1, GIRK4, Ca<sub>v</sub>1.3  
 44 and HCN4. The focal plane is placed at the level of the cell membrane adhering to the coverslip  
 45 identified by the HCN4 and GIRK1 staining (see Fig. S4 for further information). The magnified  
 46 membrane sections shown in Fig. 4C were isolated from these cells (yellow dashed squares). Scale  
 47 bar = 20 μm.

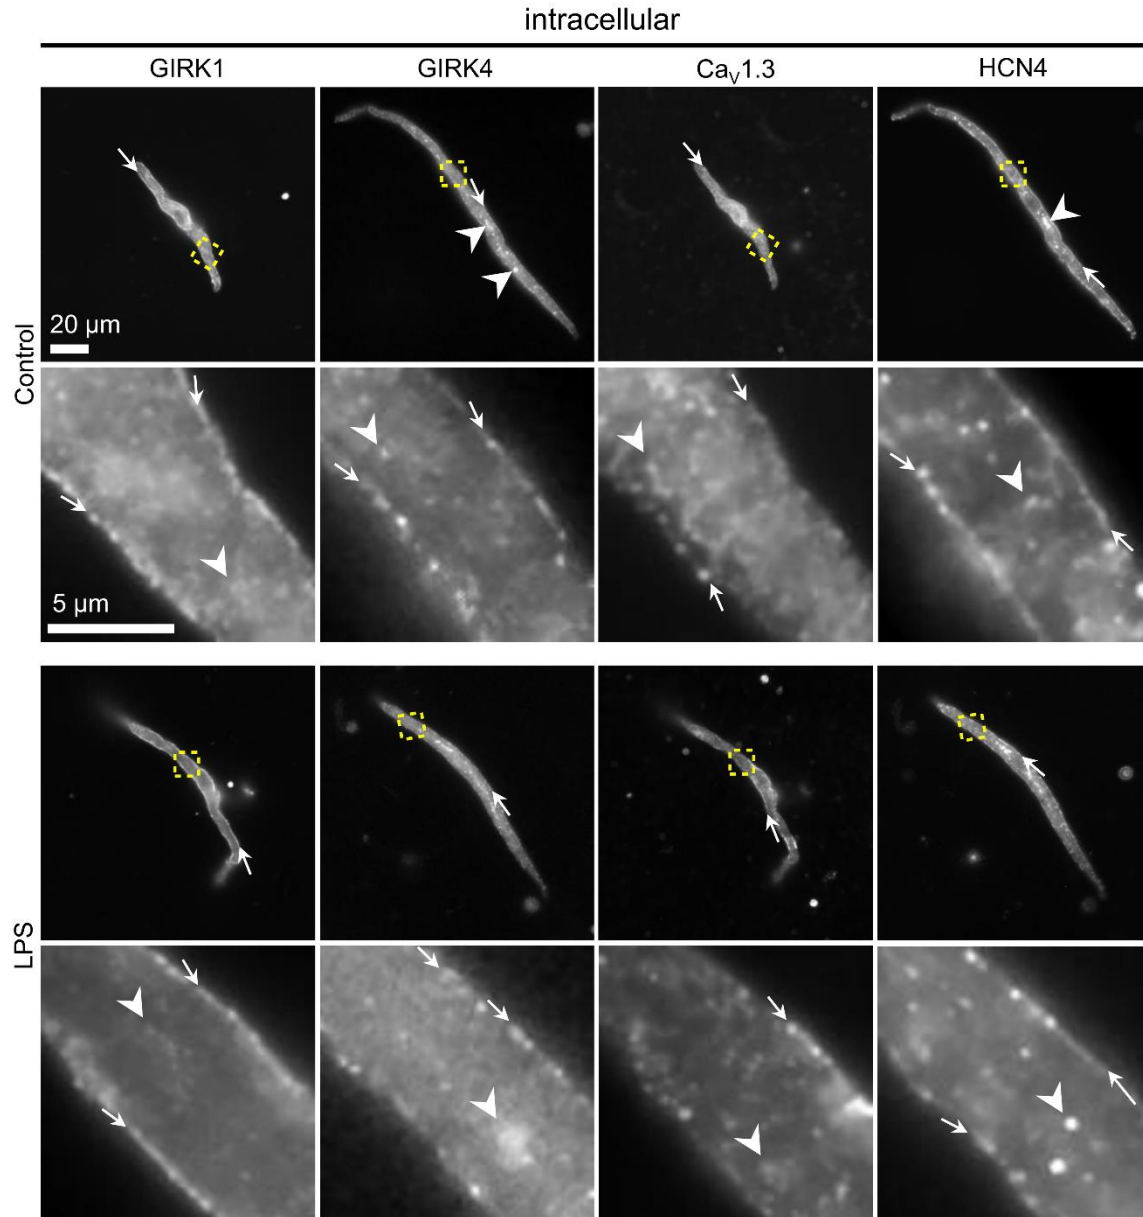

48

49 **Fig. S4. Representative longitudinal intracellular section of immunolabelled SAN cells from**  
 50 **control and LPS-injected mice.** The low magnification panels (first and third rows) show the same  
 51 SAN cells presented in Fig. S3 with the longitudinal focal plane passing through the cells. The anti-  
 52 GIRK1, GIRK4, Ca<sub>v</sub>1.3 and HCN4 staining outline marked membrane localization visible as a rim  
 53 surrounding the cells (arrows). The regions contained in the yellow dashed boxes are enlarged in  
 54 the below panels (second and fourth rows) and correspond to the membrane regions shown in Fig.  
 55 4C. Some intracellular labeling consistent with organelle localization (arrowheads) was segregated  
 56 in restricted domains well apart from the cell membrane (arrows).

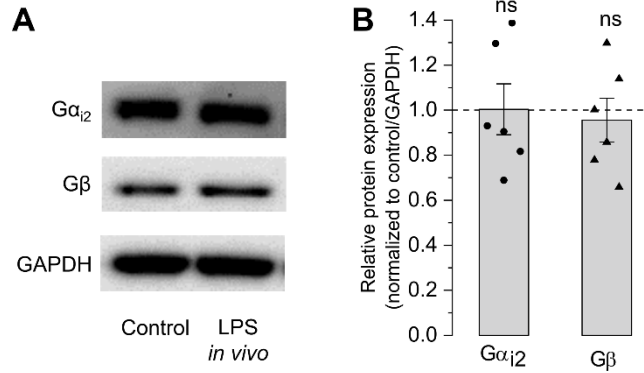

57

58 **Fig. S5. LPS does not affect expression of G-protein subunits in isolated SAN tissues.** (A)  
 59 Representative western blots and (B) scatter plot of densitometric evaluation of immunoreactive  
 60 bands showing similar expression of Gα<sub>12</sub> and Gβ in SAN tissues after 6 h of LPS i.p. injection in  
 61 mice (*in vivo*). GAPDH is used as a loading control. Data are expressed as symbols (independent  
 62 experiments, N = 6) with mean ± SEM as bars, <sup>ns</sup>p > 0.05, one-sample t-test.

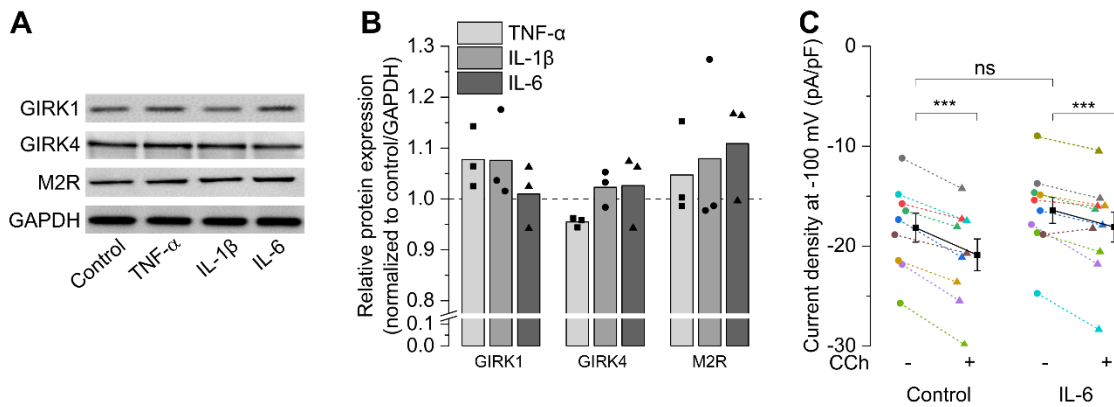

63

64 **Fig. S6. Pro-inflammatory cytokines do not directly alter expression of M2R and GIRK1/4**  
 65 **channels in isolated SAN tissues.** (A) Representative western blots and (B) densitometric  
 66 evaluation of immunoreactive bands showing absence of reduced expression of GIRK1, GIRK4  
 67 and M2R in mouse SAN tissue after 6 h incubation with TNF-α, IL-1β and IL-6. GAPDH is used as  
 68 a loading control. Bars represent mean and symbols represent independent experiments (N = 3).  
 69 (C) Scatter plot with mean ± SEM for current density at -100 mV in the absence (-) and presence  
 70 (+) of 0.1 μM CCh in the isolated control SAN cells preincubated without or with 10 ng/ml IL-6 for 2  
 71 h (N = 9, controls; N = 10, IL-6). \*\*\*p < 0.001, <sup>ns</sup>p > 0.05; mixed two-way ANOVA followed by simple  
 72 effect analysis.

**Fig. 4A**

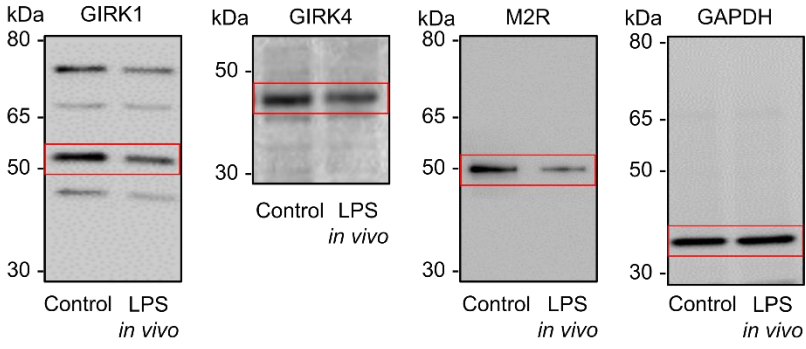

**Fig. 4B**

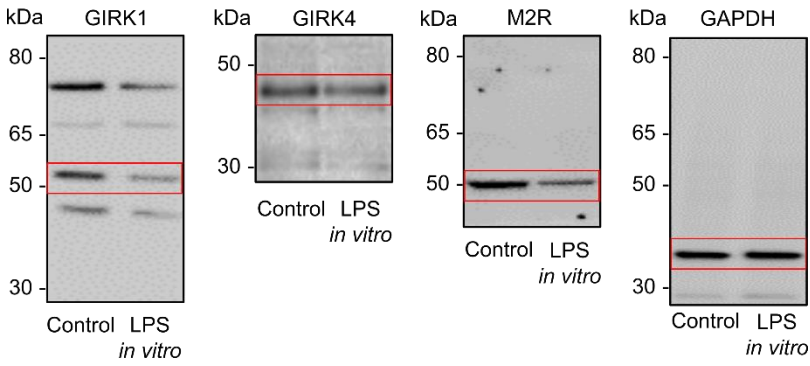

73

**Fig. S2A**

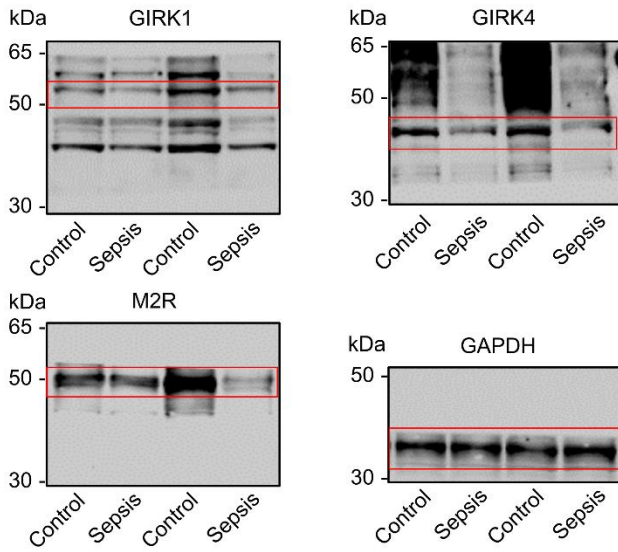

74

**Fig. S5A**

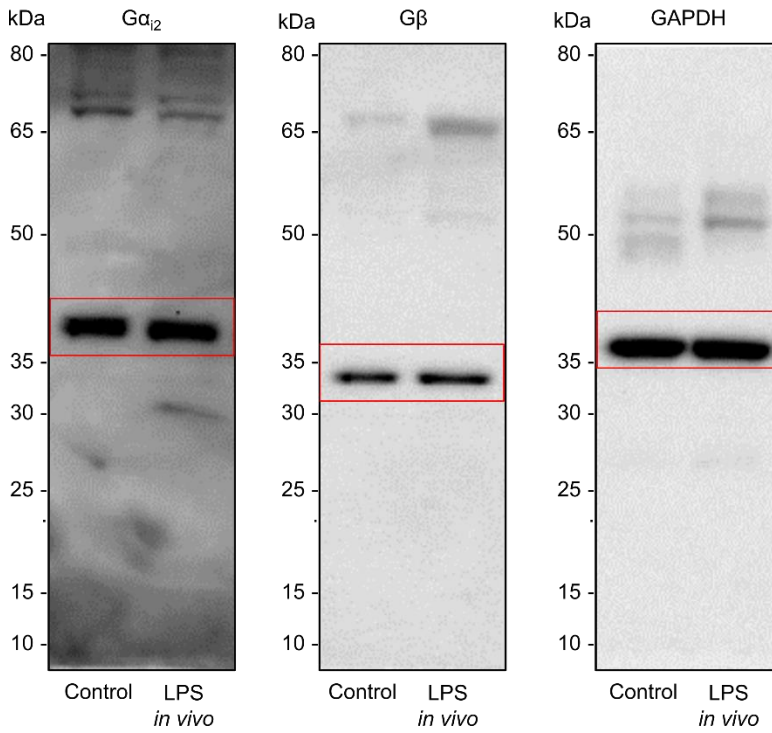

75

**Fig. S6A**

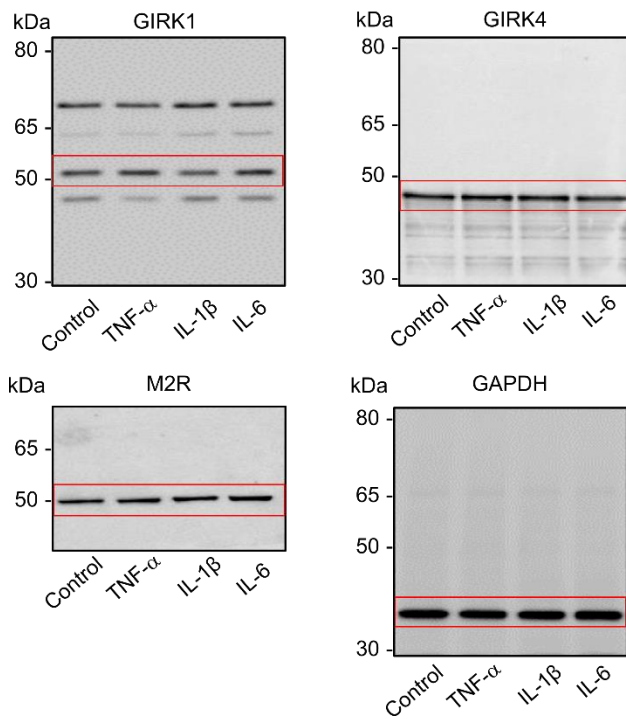

76

77 **Fig. S7. Western blot images showing the specific protein band highlighted in each blot with**  
78 **reference to molecular weight. The highlighted bands correspond to the protein bands shown in**  
79 **the western blot images in Figs. 4A-B, S2A, S5A, S6A.**
